# Genome wide association study of behavioral, physiological and gene expression traits in a multigenerational mouse intercross

**Authors:** Natalia M. Gonzales<sup>1</sup>, Jungkyun Seo<sup>2,3</sup>, Ana Isabel Hernandez-Cordero<sup>4</sup>, Celine L. St. Pierre<sup>5</sup>, Jennifer S. Gregory<sup>4</sup>, Margaret G. Distler<sup>1</sup>, Mark Abney<sup>1</sup>, Stefan Canzar<sup>8</sup>, Arimantas Lionikas<sup>4</sup>, and Abraham A. Palmer<sup>6,7</sup>

**Corresponding author:** Abraham A. Palmer; aapalmer [at] ucsd [dot] edu

ORCID: [orcid.org/0000-0003-3634-0747](https://orcid.org/0000-0003-3634-0747)

## Affiliations

1. Department of Human Genetics, University of Chicago, Chicago, IL 60637, USA
2. Computational Biology & Bioinformatics Graduate Program, Duke University, Durham, NC, 27708, USA
3. Center for Genomic & Computational Biology, Duke University, Durham, NC, 27708, USA
4. School of Medicine, Medical Sciences and Nutrition, College of Life Sciences and Medicine, University of Aberdeen, Aberdeen, UK
5. Department of Genetics, Washington University School of Medicine, St. Louis, MO 63108, USA
6. Department of Psychiatry, University of California San Diego, La Jolla, CA 92093, USA
7. Institute for Genomic Medicine, University of California San Diego, La Jolla, CA 92093, USA
8. Gene Center, Ludwig-Maximilians-Universität München, 81377 Munich, Germany

# 1 Abstract

2 Genome wide association analyses (**GWAS**) in model organisms have numerous advantages compared  
3 to human GWAS, including the ability to use populations with well-defined genetic diversity, the ability to  
4 collect tissue for gene expression analysis and the ability to perform experimental manipulations. We  
5 examined behavioral, physiological, and gene expression traits in 1,063 male and female mice from a  
6 50-generation intercross between two inbred strains (LG/J and SM/J). We used genotyping by  
7 sequencing in conjunction with whole genome sequence data from the two founder strains to obtain  
8 genotypes at 4.3 million SNPs. As expected, all alleles were common (mean MAF=0.35) and linkage  
9 disequilibrium degraded rapidly, providing excellent power and sub-megabase mapping precision. We  
10 identified 126 genome-wide significant loci for 50 traits and integrated this information with 7,081 *cis*-  
11 eQTLs and 1,476 *trans*-eQTLs identified in hippocampus, striatum and prefrontal cortex. We replicated  
12 several loci that were identified using an earlier generation of this intercross, including an association  
13 between locomotor activity and a locus containing a single gene, *Csmd1*. We also showed that *Csmd1*  
14 mutant mice recapitulated the locomotor phenotype. Our results demonstrate the utility of this population,  
15 identify numerous novel associations, and provide examples of replication in an independent cohort,  
16 which is customary in human genetics, and replication by experimental manipulation, which is a unique  
17 advantage of model organisms.

18

## 19 Introduction

20 Genome-wide association studies (**GWAS**) have revolutionized psychiatric genetics; however, they have  
21 also presented numerous challenges. Some of these challenges can be addressed by using model  
22 organisms. For example, human GWAS are confounded by environmental variables, such as childhood  
23 trauma, which can reduce power to detect genetic associations. In model organisms, environmental  
24 variables can be carefully controlled. Furthermore, it has become clear that phenotypic variation in  
25 humans is due to numerous common and rare variants of small effect. In model organisms, genetic  
26 diversity can be controlled such that all variants are common. In addition, allelic effect sizes in model  
27 organisms are dramatically larger than in humans (Flint and Mackay 2009; Parker and Palmer 2011).  
28 Furthermore, because the majority of associated loci are in noncoding regions, expression quantitative  
29 trait loci (**eQTLs**) are useful for elucidating underlying molecular mechanisms (GTEx Consortium et al.  
30 2017; Albert and Kruglyak 2015). However, it remains challenging to obtain large, high quality samples of  
31 human tissue, particularly from the brain. In contrast, tissue for gene expression studies can be collected  
32 from model organisms under optimal conditions. Finally, the genomes of model organisms can be edited  
33 to assess the functional consequences of specific mutations.

34 Model organism GWAS often employ multigenerational intercrosses because they promote  
35 recombination of ancestral haplotypes. We used an advanced intercross line (**AIL**) of mice, which is the  
36 simplest possible multigenerational intercross. AILs, originally proposed by Darvasi and Soller (Darvasi  
37 and Soller 1995), are produced by intercrossing two inbred strains beyond the F2 generation. Because  
38 the two inbred strains contribute equally to an AIL, all variants are common, and alleles that are identical  
39 by state are necessarily identical by descent (**IBD**), which greatly simplifies phasing and imputation. We  
40 performed a GWAS using the world's most advanced mouse AIL, which was created over 50 generations  
41 ago by crossing the LG/J (**LG**) and SM/J (**SM**) inbred strains (Ehrich et al. 2005a). We investigated over  
42 100 traits using mice from generations 50-56 (**G50-56**), including locomotor activity, response to  
43 methamphetamine, prepulse inhibition (**PPI**), body weight, and various muscle and bone phenotypes. We  
44 also sequenced mRNA from three brain regions and used those data to map eQTLs and identify  
45 quantitative trait genes (**QTGs**) at each locus. Finally, we explored replication of previous associations

46 identified in LG x SM G34 (Cheng et al. 2010; Samocha et al. 2010; Parker et al. 2014; Lionikas et al.  
47 2010; Parker et al. 2011) and used mutant mice to test one of our strongest candidate QTGs.

## 48 Results

49 We used genotyping by  
50 sequencing (GBS) to  
51 genotype 1,063 of the 1,123  
52 mice that were phenotyped  
53 (60 were not successfully  
54 genotyped for technical  
55 reasons described in the  
56 **Supplemental Methods**).

57 After quality control, GBS  
58 yielded 38,238 autosomal  
59 SNPs. In the 24 AIL mice  
60 that were also genotyped on  
61 the Giga Mouse Universal  
62 Genotyping Array  
63 (**GigaMUGA**; Morgan et al.

64 2015), only 24,934 markers  
65 were polymorphic in LG and  
66 SM (**Supplemental Fig.S1**).  
67 LG and SM have been re-  
68 sequenced (Nikolskiy et al.  
69 2015), which allowed us to

70 impute AIL genotypes at ~4.3 million single nucleotide polymorphisms (**SNPs**; **Fig.1A**). Consistent with  
71 the expectation for an AIL, the average minor allele frequency (**MAF**) was high (**Fig.1B**). Linkage

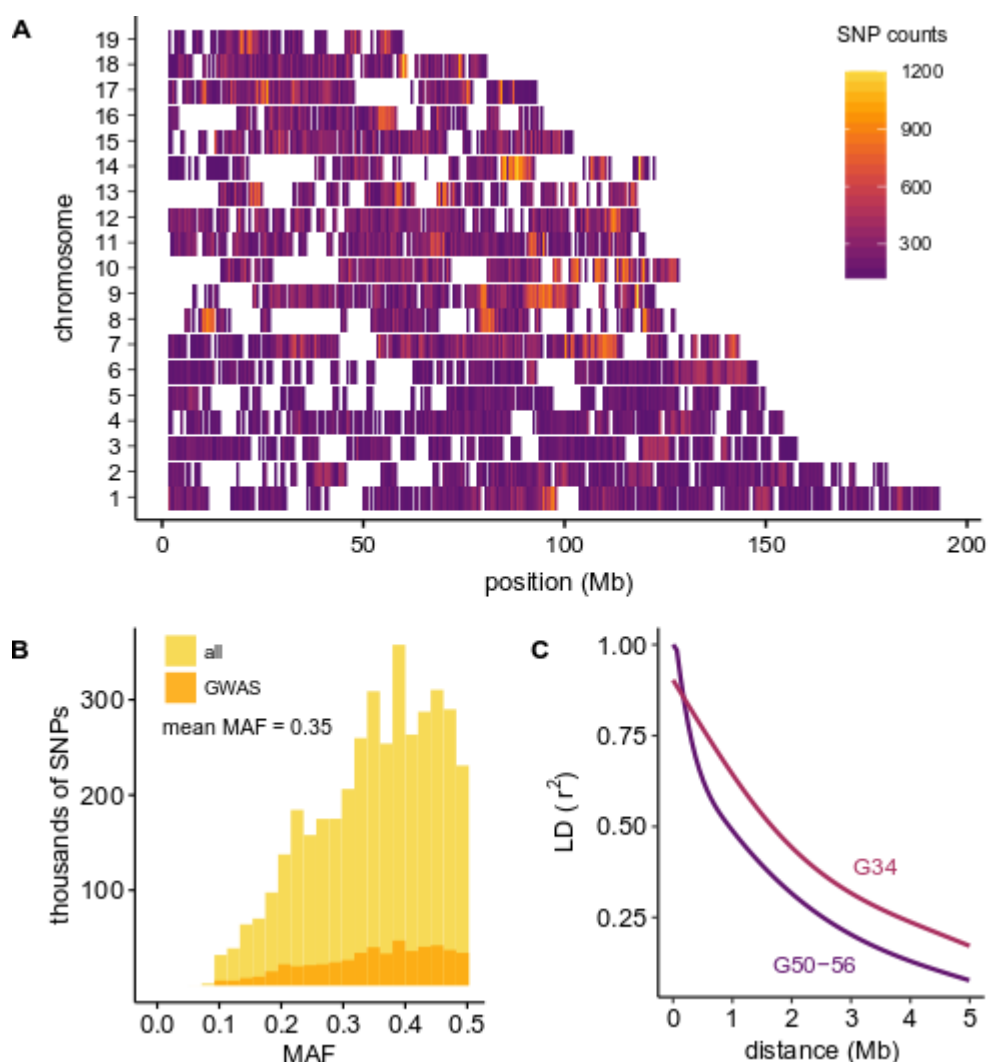

**Figure 1. SNPs, minor allele frequencies (MAFs) and linkage disequilibrium (LD) decay in the LG x SM AIL.** Imputation provided ~4.3 million SNPs. Filtering for LD ( $r^2 \geq 0.95$ ), MAF  $< 0.1$ , and HWE ( $p \leq 7.62 \times 10^{-6}$ ) resulted in 523,028 SNPs for GWAS. **(A)** SNP distribution and density of GWAS SNPs are plotted in 500 kb windows for each chromosome. As shown in **Supplemental Fig.1**, regions with low SNP density correspond to regions predicted to be nearly IBD in LG and SM (Nikolskiy et al. 2015). **(B)** MAF distributions are shown for ~4.3 million imputed SNPs (gold; unfiltered) and for the 523,028 SNPs used for GWAS (orange; filtered). Mean MAF is the same in both SNP sets. **(C)** Comparison of LD decay in G50-56 (dark purple) and G34 (light purple) of the LG x SM AIL. Each curve was plotted using the 95<sup>th</sup> percentile of  $r^2$  values for SNPs spaced up to 5 Mb apart.

72 disequilibrium (**LD**) decay, which is critical to mapping resolution, has improved since LG x SM G34  
73 (**Fig.1C**; Cheng et al. 2010).

74 **LOCO-LMM** effectively reduces the type II error rate

75 Linear mixed models (**LMMs**) are commonly used to perform GWAS in AILs and other populations that  
76 include close relatives (Gonzales and Palmer 2014). SNP data are used to obtain a genetic relationship  
77 matrix (**GRM**); however,

78 this can lead to an  
79 inflation of the type II error  
80 rate due to proximal  
81 contamination (Cheng et  
82 al. 2013; Listgarten et al.  
83 2012). We previously

84 proposed using a leave-  
85 one-chromosome-out  
86 LMM (**LOCO-LMM**) to  
87 address this issue (Cheng  
88 et al. 2013). To

89 demonstrate the  
90 appropriateness of a  
91 **LOCO-LMM**, we  
92 performed a GWAS for  
93 albinism, which is a

94 recessive Mendelian trait,  
95 using three approaches: a  
96 simple linear model, an  
97 LMM and a **LOCO-LMM**  
98 (**Fig.2**). GWAS using a

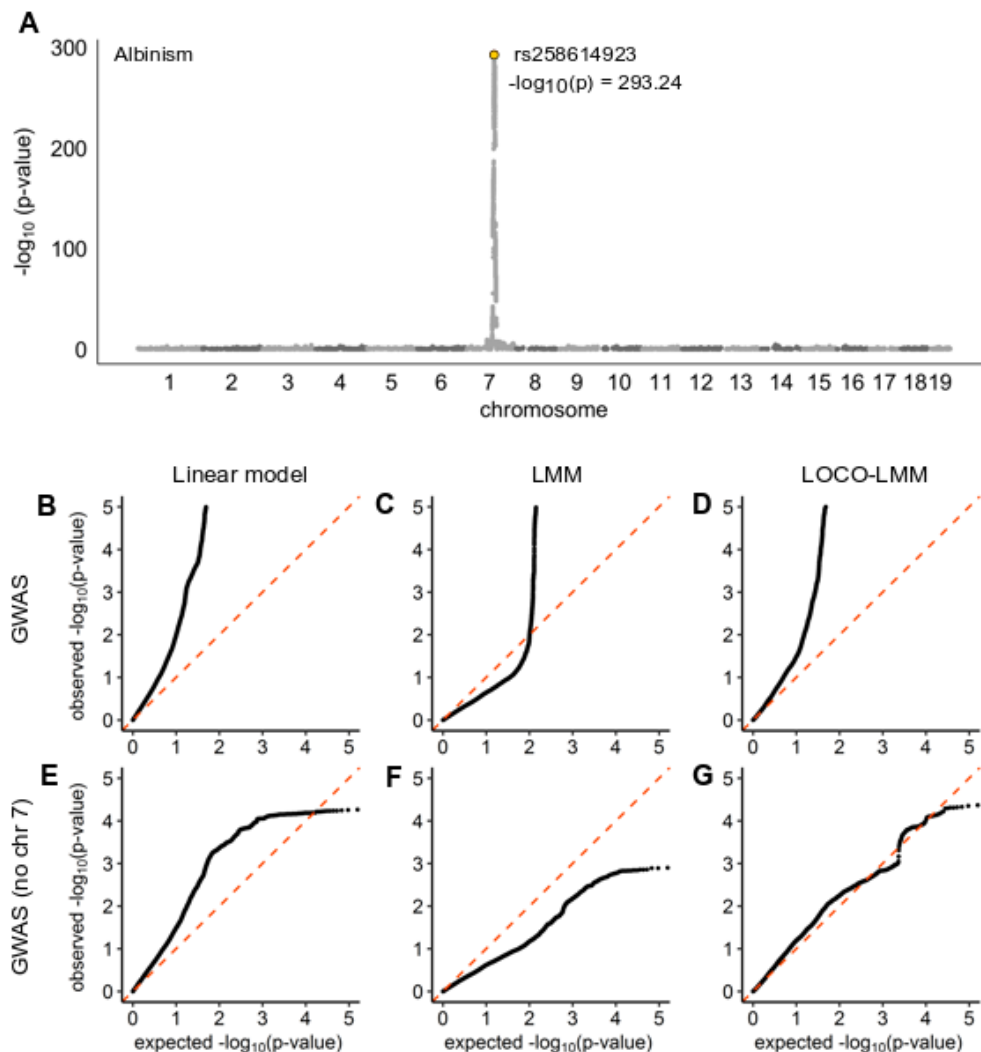

**Figure 2. GWAS for albinism verifies that the LOCO-LMM effectively controls type I and type II error.** We conducted a GWAS for albinism, a Mendelian trait caused by the *Tyr* locus on mouse chromosome 7, using three models: a linear model, an LMM, and a LOCO-LMM. We also repeated each scan after excluding SNPs on chromosome 7. A Manhattan plot of results from the LOCO-LMM is shown in (A). Quantile-quantile plots of expected vs. observed p-values are shown for (B) a simple linear model that does not account for relatedness; (C) a standard LMM that includes all GWAS SNPs in the genetic relatedness matrix (**GRM**; i.e. the random effect); and (D) a LOCO-LMM whose GRM excludes SNPs located on the chromosome being tested. Plots (E-G) show results after excluding chromosome 7 from the GWAS.

99 LOCO-LMM for albinism yielded an association on chromosome 7 (**Fig.2A**); accurately identifying the  
100 albino locus (*Tyr*). As expected, p-values from a genome-wide scan using a linear model, which does not  
101 account for relatedness, appeared highly inflated (**Fig.2B**). This inflation was greatly reduced by fitting a  
102 standard LMM, which included SNPs from chromosome 7 in both the fixed and random effects (**Fig.2C**).  
103 The LOCO-LMM, which does not include SNPs from the chromosome being tested in the GRM, showed  
104 an intermediate level of inflation (**Fig.2D**). Was the inflation observed in **Fig.2B-D** due to true signal, or  
105 uncontrolled population structure? To address this question, we repeated these analyses after excluding  
106 SNPs on chromosome 7 from the fixed effect (**Fig.2E-G**). Even in the absence of the causal locus, the  
107 simple linear model showed substantial inflation, which can only be explained by population structure  
108 (**Fig.2E**). The standard LMM appeared overly conservative, which we attributed to proximal  
109 contamination (**Fig.2F**). The LOCO-LMM showed no inflation, consistent with the absence of *Tyr* and  
110 linked SNPs in the fixed effect (**Fig.2G**). These results demonstrate the appropriateness of a LOCO-  
111 LMM.

## 112 Genetic architecture of complex traits in the LG x SM AIL

113 We used an LD-pruned set of 523,028 autosomal SNPs genotyped in 1,063 mice from LG x SM G50-56  
114 to perform GWAS for 120 behavioral and physiological traits using a LOCO-LMM (**Fig.3A**). We used  
115 permutation to define a significance threshold of  $p=8.06 \times 10^{-6}$  ( $\alpha=0.05$ ). There were 52 loci associated  
116 with 33 behavioral traits and 74 loci associated with 17 physiological traits (**Fig.3A, Supplemental Table**  
117 **S1; Supplemental Fig.S2**).

118 To estimate the heritability attributable to SNPs ('**SNP heritability**'), we calculated the proportion  
119 of trait variance explained by the additive effects of 523,028 SNPs. In general, heritability estimates were  
120 larger for physiological traits than for behavioral traits (**Fig.3B, Supplemental Table S2**), which is  
121 consistent with findings in other rodent GWAS (Parker et al. 2016; Nicod et al. 2016; Rat Genome  
122 Sequencing and Mapping Consortium et al. 2013). Mean heritability was 0.355 (se=0.045) for  
123 physiological traits and 0.168 (se=0.038) for behavioral traits (conditioned place preference, locomotor  
124 sensitization, and habituation to startle were not found to have a genetic component and were excluded  
125 from the mean). In general, traits with higher heritabilities yielded more associations (**Supplemental**

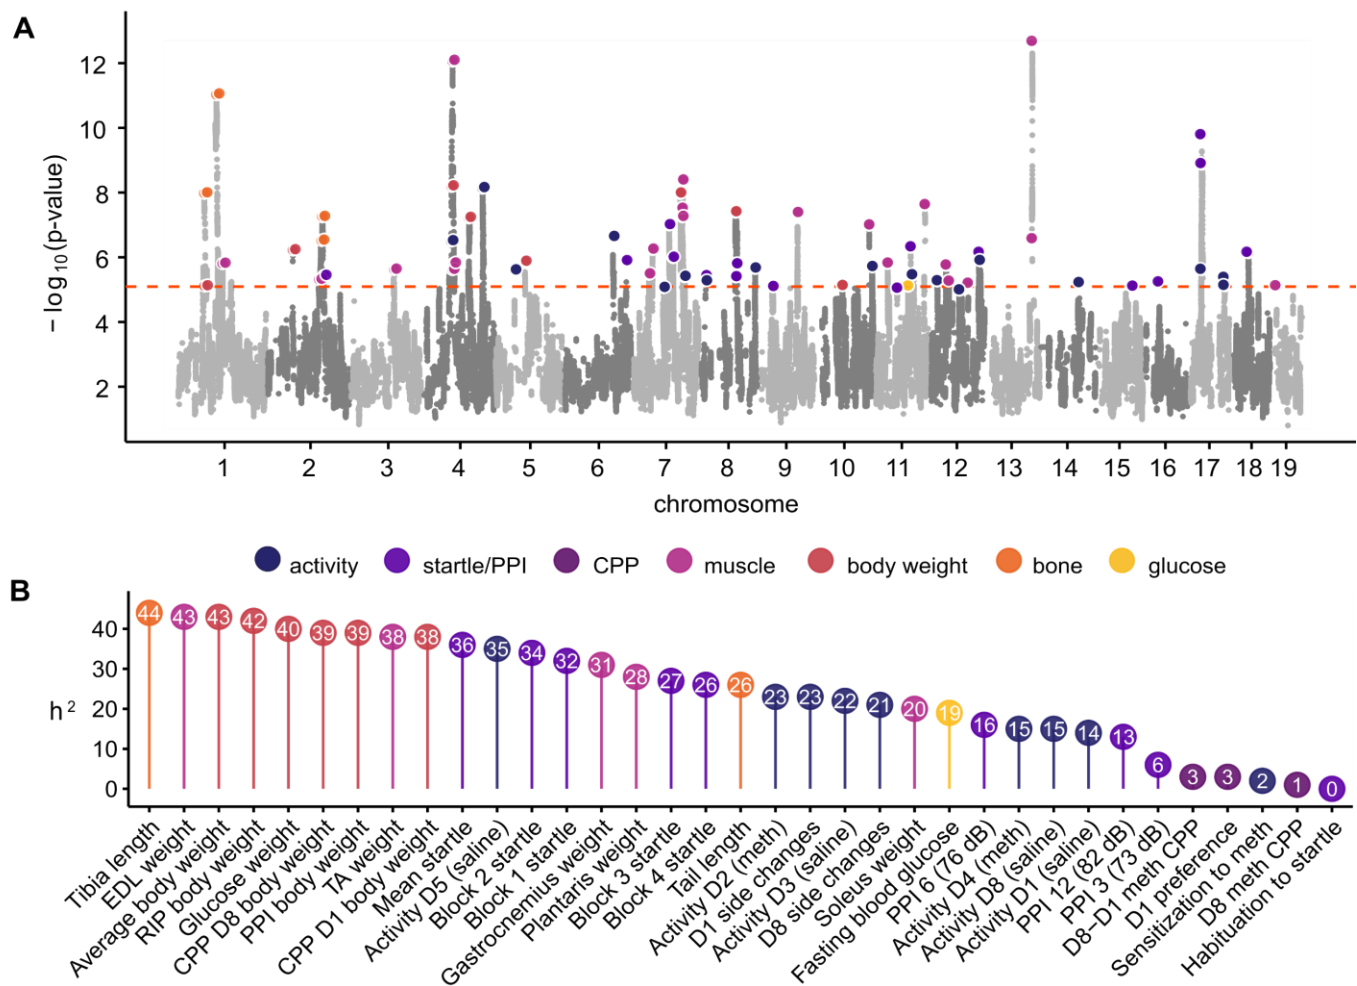

**Figure 3. Manhattan plot and heritability for 120 traits measured in the LG x SM AIL.** We identified 126 loci for behavioral and physiological traits using 1,063 mice from G50-56 of the LG x SM AIL. A Manhattan plot of GWAS results is shown in **(A)**. Associations for related traits are grouped by color. For clarity, related traits that mapped to the same locus (**Supplemental Table S1**) are highlighted only once. The dashed line indicates a permutation-derived significance threshold of  $-\log_{10}(p)=5.09$  ( $p=8.06 \times 10^{-6}$ ;  $\alpha=0.05$ ). **(B)** For a representative subset of traits, SNP heritability estimates (percent trait variance explained by 523,028 GWAS SNPs) for a subset of traits are shown. Precise estimates of heritability with standard error are provided for all traits in **Supplemental Table S2**.

126 **Fig.S2**). However, there was no significant relationship between heritability and effect size at individual  
 127 loci (**Supplemental Fig.S3**), suggesting that high heritability does not reliably predict the presence of  
 128 large-effect alleles.

129 eQTLs

130 For a subset of phenotyped and genotyped mice, we used RNA-sequencing (**RNA-seq**) to measure  
 131 gene expression in the hippocampus (**HIP**), prefrontal cortex (**PFC**) and striatum (**STR**) ( $\alpha=0.05$ ; **Fig.4**,  
 132 **Supplemental Fig.S4**). We identified 2,902 *cis*-eQTLs in HIP, 2,125 *cis*-eQTLs in PFC and 2,054 *cis*-  
 133 eQTLs in STR; 1,087 *cis*-eQTLs were significant in all three tissues (FDR<0.05; **Supplemental Table**

134 **S3)**. We also identified 562 HIP *trans*-eQTLs, 408 PFC *trans*-eQTLs and 506 STR *trans*-eQTLs ( $p < 0.05$ ;  
135 **Supplemental Fig.S5; Supplemental Table S4)**.

136 Previous studies in model organisms have identified *trans*-eQTLs that regulate the expression of  
137 many genes (Chesler et al. 2005; Hasin-Brumshtein et al. 2016; Albert and Kruglyak 2015); we refer to  
138 these as '**master eQTLs**'. We identified several master eQTLs, including one on chromosome 12 (70.19-

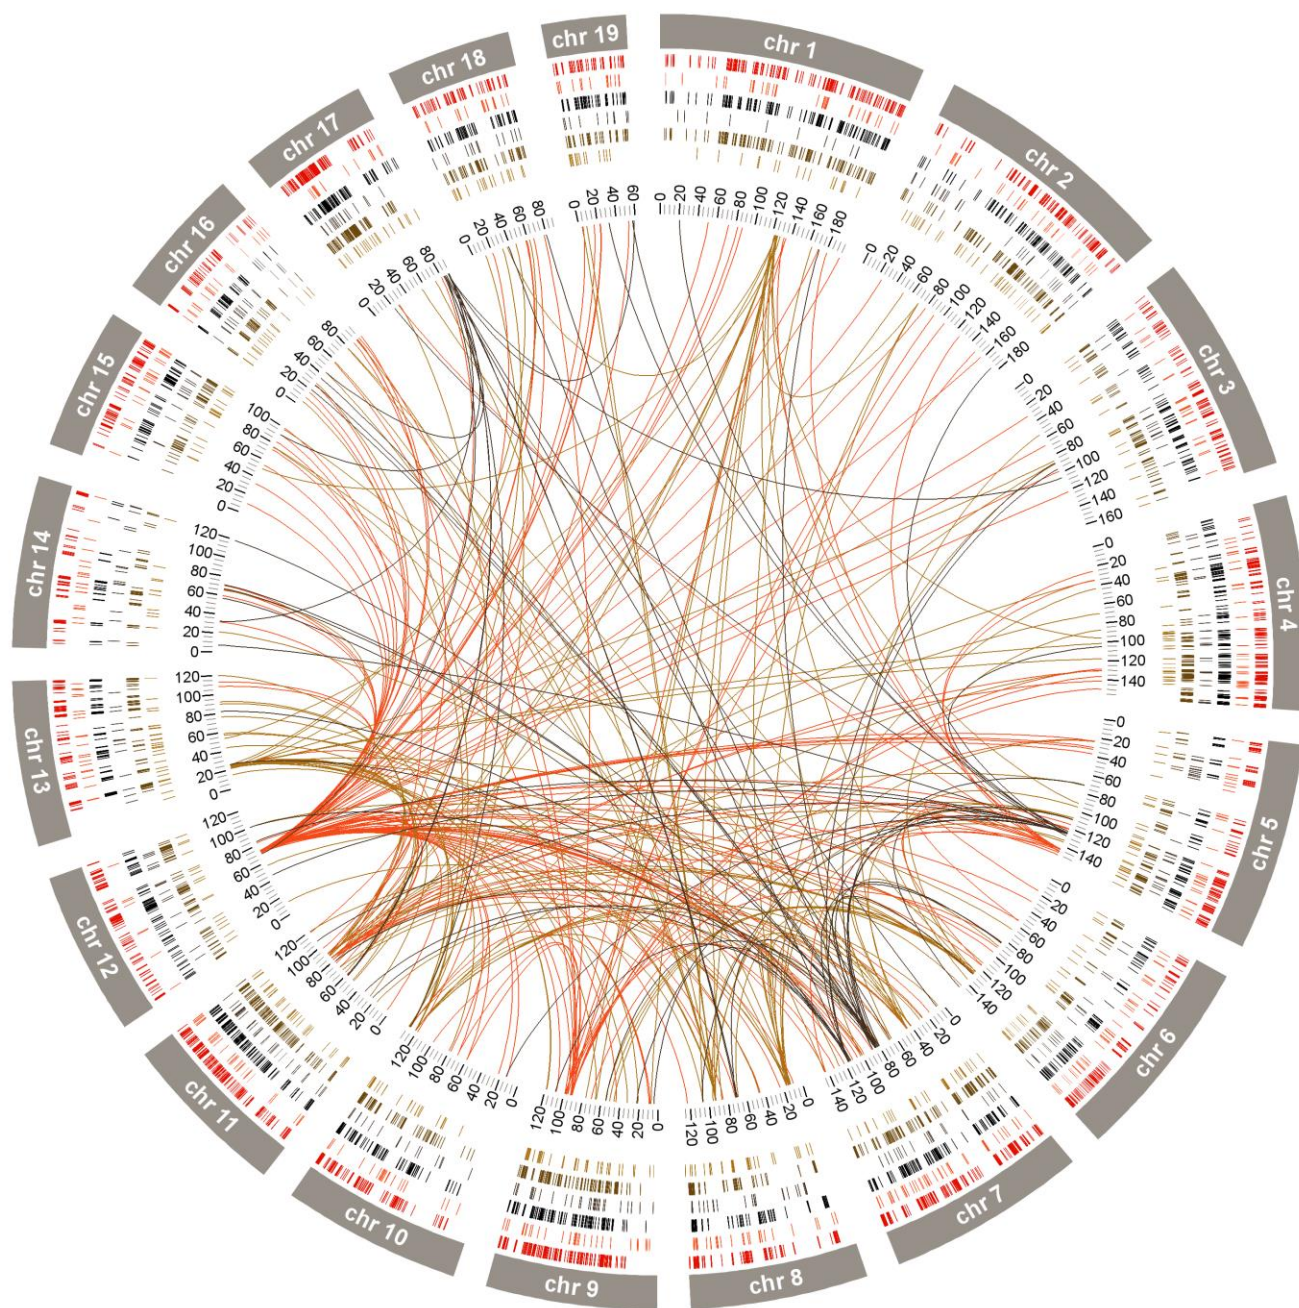

**Figure 4. eQTLs in hippocampus (HIP), prefrontal cortex (PFC) and striatum (STR).** We identified over 7,000 *cis*-eQTLs ( $FDR < 0.05$ ) and over 1,400 *trans*-eQTLs ( $\alpha = 0.05$ ) in HIP ( $n = 208$ ; outer red for *cis*-eQTLs, inner red for *trans*-eQTLs), PFC ( $n = 185$ ; outer black for *cis*-eQTLs, inner black for *trans*-eQTL) and STR ( $n = 169$ ; outer brown for *cis*-eQTLs, inner brown for *trans*-eQTLs). We also identified master eQTLs, which we defined as loci that regulate the expression of ten or more target eGenes in a given tissue (central lines link master eQTLs to eGenes).



139 73.72 Mb) that was associated with the expression of 85 genes distributed throughout the genome  
140 (**Fig.4; Supplemental Table S4**). This locus was present in HIP, but not in PFC or STR.

## 141 Integration of eQTLs and behavioral GWAS results

142 Based on results from human GWAS (Albert and Kruglyak 2015; GTEx Consortium et al. 2017), we  
143 hypothesized that most loci associated with behavior were due to gene expression differences. For  
144 example, four loci associated with locomotor behavior mapped to the same region on chromosome 17  
145 (**Supplemental Table S1; Supplemental Fig.S2**). The narrowest of these (D1 side changes, 15-20 min;  
146  $p=3.60 \times 10^{-6}$ ) identified a locus that contains a single gene, *Crim1* (cysteine rich transmembrane BMP  
147 regulator 1), which had a significant *cis*-eQTL in HIP. It would be tempting to conclude that *Crim1* is the  
148 best candidate to explain the associations with locomotor behavior; however, two nearby genes, *Qpct*  
149 (glutaminyl-peptide cyclotransferase) and *Vit* (vitrin), though physically located outside of the locus, also  
150 had *cis*-eQTLs within the locomotor-associated region (**Supplemental Table S3**). We therefore consider  
151 all three genes valid candidates to explain the association with locomotor behavior.

152 One of the most significant loci we identified was an association with the startle response, also on  
153 chromosome 17 ( $p=5.28 \times 10^{-10}$ ; **Fig.3; Supplemental Fig.S2**). This result replicated a previous  
154 association with startle from a prior study using G34 mice (Samocha et al. 2010). We performed a  
155 phenome-wide association analysis (**PheWAS**) which showed that this region pleiotropically affected  
156 multiple other traits, including locomotor activity following saline and methamphetamine administration  
157 (**Supplemental Fig.S6**). This region was also implicated in conditioned fear and anxiety in our prior  
158 studies of G34 mice (Parker et al. 2014), demonstrating that it has extensive pleiotropic effects on  
159 behavior. Because the association with startle identifies a relatively large haplotype that includes over 25  
160 eGenes, our data cannot clarify whether the pleiotropic effects are due to one or several genes in this  
161 interval.

162 We also identified a 0.49-Mb locus on chromosome 8 that was associated with locomotor activity  
163 (**Fig.5A; Supplemental Table S1**); this region was nominally associated with PPI and multiple other  
164 activity traits (**Fig.5B**). The region identified in the present study (**Fig.5A-C**) replicates a finding from our  
165 previous study using G34 mice (Cheng et al. 2010; **Fig.5D**). In both cases, the SM allele conferred

166 increased activity (**Fig.5C,D**) and the implicated locus contained only one gene: *Csmd1* (CUB and sushi  
 167 multiple domains 1; **Fig.5B**; **Supplemental Table S2**); furthermore, the only *cis*-eQTL that mapped to  
 168 this region was for *Csmd1* (**Supplemental Fig.S7**). We obtained mice in which the first exon of *Csmd1*  
 169 was deleted to test the hypothesis that *Csmd1* is the QTG for this locus. *Csmd1* mutant mice exhibited  
 170 increased activity compared to heterozygous and wild-type mice (**Fig.5E**), similar to the SM allele. This  
 171 result is consistent with the hypothesis that *Csmd1* is the causal gene.

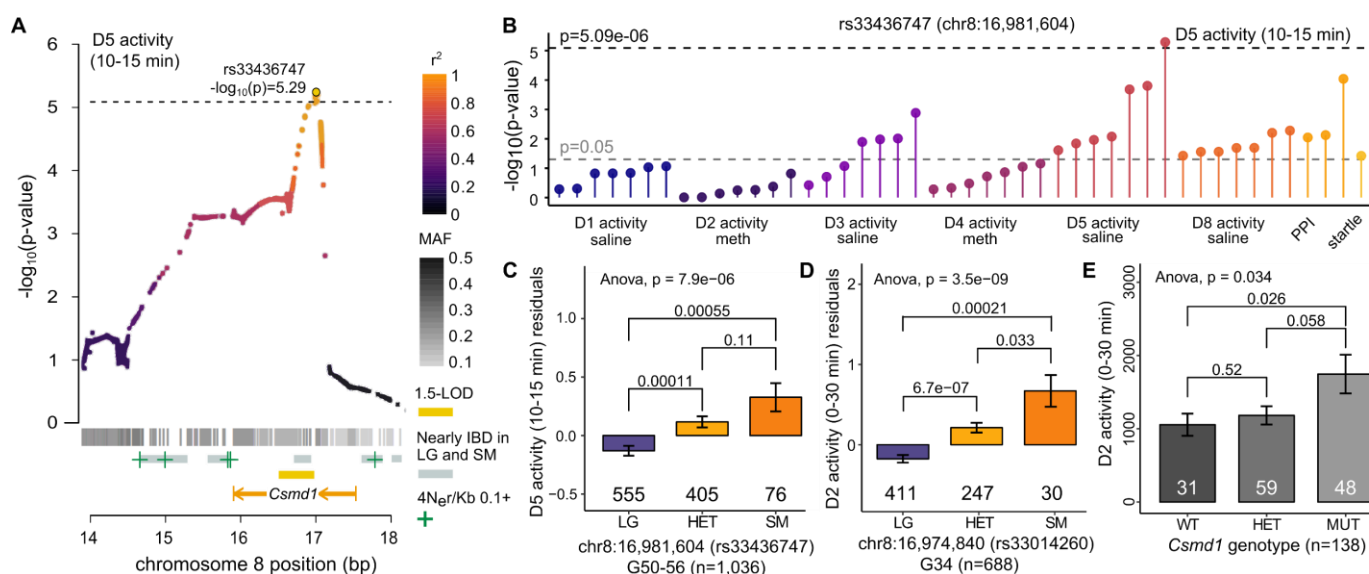

172 We identified seven overlapping loci for locomotor activity on chromosome 4 (**Supplemental**  
 173 **Table S1**; **Supplemental Fig.S2**). The strongest locus (D5 activity, 0-30 min;  $p=6.75 \times 10^{-9}$ ) spanned 2.31  
 174 Mb and completely encompassed the narrowest locus, which spanned 0.74 Mb (D5 activity, 25-30 min;  
 175  $p=4.66 \times 10^{-8}$ ); therefore, we focused on the smaller region. *Oprd1* (opioid receptor delta-1) was a *cis*-  
 176 eGene in all three brain regions; the SM allele conferred an increase in locomotor activity and was  
 177 associated with decreased expression of *Oprd1*. *Oprd1* knockout mice have been reported to display  
 178 increased activity relative to wild-type mice (Filliol et al. 2000), suggesting that differential expression of

179 *Oprd1* could explain the locomotor effect at this locus. However, the presence of other genes and  
180 eGenes within the region make it difficult to determine whether *Oprd1* is the only QTG.

181 We identified an association with D1 locomotor behavior on chromosome 6 at rs108610974,  
182 which is located in an intron of *Itpr1* (inositol 1,4,5-trisphosphate receptor type 1; **Supplemental Fig.S8**).  
183 This locus contained three *cis*-eGenes and seven *trans*-eQTLs (**Supplemental Fig.S8**). One of the  
184 *trans*-eGenes targeted by the locus (*Capn5*; calpain 5) was most strongly associated with rs108610974  
185 and may be the QTG (**Supplemental Table S4**). These results illustrate how the knowledge of both *cis*-  
186 and *trans*-eQTLs informed our search for QTGs.

## 187 Pleiotropic effects on physiological traits

188 Because LG and SM were created by selective breeding for large (LG) and small (SM) body size, this  
189 AIL is expected to segregate numerous body size alleles (Lawson and Cheverud 2010; Parker et al.  
190 2011). We measured body weight at ten timepoints throughout development and identified 46  
191 associations. There was extensive pleiotropy among body weight, muscle mass, and bone length  
192 (**Supplemental Table S1; Supplemental Fig.S9-S12**). Accounting for pleiotropic genetic architecture,  
193 eight major loci arose that influenced body weight at multiple timepoints (**Fig. 3A; Supplemental Table**  
194 **S1**).

195 For example, eight body weight timepoints mapped to a region on chromosome 2, where the LG  
196 allele was associated with smaller body mass (**Supplemental Table S1; Supplemental Fig.S2,S9**). The  
197 narrowest region spanned 0.08 Mb and did not contain any genes. However, the 0.08-Mb interval  
198 contained a *cis*-eQTL SNP for *Nr4a2* (nuclear receptor subfamily 4, group A, member 2) in PFC. Mice  
199 lacking *Nr4a2* in midbrain dopamine neurons exhibit a 40% reduction in body weight (Kadkhodaei et al.  
200 2009). Consistent with this, the LG allele was associated with decreased expression of *Nr4a2*.

201 All body weight timepoints were associated with a locus on chromosome 7 (**Supplemental Table**  
202 **S1; Supplemental Fig.S2**). We also identified associations for tibialis anterior (TA), gastrocnemius,  
203 plantaris weight that partially overlapped this region (**Supplemental Fig.S10**). Although the most  
204 significant SNP associated with muscle weight was ~5 Mb downstream of the top body weight SNP, the  
205 LG allele was associated with greater weight at both loci (**Supplemental Table S1**). For eight out of ten

206 body weight timepoints, the most significant association fell within *Tpp1* (tripeptidyl peptidase 1), which  
207 was a *cis*-eGene in all tissues and a *trans*-eGene targeted by the master HIP eQTL on chromosome 12  
208 (**Fig.4**). To our knowledge, *Tpp1* has not been shown to affect body size in mice or humans; however,  
209 four other *cis*-eGenes in the region have been associated with human body mass index (*Rpl27a*, *Stk33*,  
210 *Trim66*, and *Tub*) (Berndt et al. 2013; Locke et al. 2015). Dysfunction of *Tub* (tubby bipartite transcription  
211 factor) causes late-onset obesity in mice, perhaps due to *Tub*'s role in insulin signaling (Stretton et al.  
212 2009). In addition, several *trans*-eGenes map to this interval, including *Gnb1* (G protein subunit beta 1),  
213 which forms a complex with *Tub* (Baehr and Frederick 2009). Another *trans*-eGene associated with this  
214 interval, *Crebbp* (*CREB* binding protein), has been associated with juvenile obesity in human GWAS  
215 (Comuzzie et al. 2012).

## 216 Multiple strong associations identified for muscle mass

217 We examined five hind limb muscle traits, identifying 22 loci (**Supplemental Table S1; Supplemental**  
218 **Fig.S2**). No loci were identified for soleus weight. The strongest association we identified in this study  
219 was for extensor digitorum longus (**EDL**) weight ( $p=2.03 \times 10^{-13}$ ; **Supplemental Table S1; Supplemental**  
220 **Fig.S11**). An association with gastrocnemius weight provided additional support for the region  
221 ( $p=2.56 \times 10^{-7}$ ; **Supplemental Fig.S11**); in both cases, the SM allele was associated with increased  
222 muscle mass. Each locus spans less than 0.5 Mb and is flanked by regions of low polymorphism  
223 between LG and SM (**Supplemental Fig.S11, Supplemental Table S1**). Two *cis*-eGenes within the  
224 region, *Trappc13* (trafficking protein particle complex 13) and *Nln* (neurolysin), are differentially  
225 expressed in LG and SM soleus (Carroll et al. 2017) and TA (Lionikas et al. 2012), with LG exhibiting  
226 increased expression of both genes. While there is no known relationship between *Trappc13* and  
227 muscle, *Nln* has been shown to play a role in mouse skeletal muscle (Cavalcanti et al. 2014).

228 The LG allele was associated with greater EDL, plantaris, and TA weight at another locus on  
229 chromosome 4 (**Supplemental Table S1; Supplemental Fig.S12**). The loci for EDL and plantaris  
230 spanned ~0.5 Mb, defining a region that contained six genes (**Supplemental Table S1**). The top SNPs  
231 for EDL (rs239008301;  $p=7.88 \times 10^{-13}$ ) and plantaris (rs246489756;  $p=2.25 \times 10^{-6}$ ) were located in an intron  
232 of *Astn2* (astrotactin 2), which is differentially expressed in LG and SM soleus (Carroll et al. 2017). SM,

233 which exhibits lower expression of *Astn2* in soleus relative to LG (Carroll et al. 2017), has a 16 bp  
234 insertion in an enhancer region 6.6 kb upstream of *Astn2* (ENSMUSR00000192783; Nikolskiy et al.  
235 2015). Two other genes in this region have been associated with muscle or bone phenotypes traits in the  
236 mouse: *Tlr4* (toll-like receptor 4), which harbors one synonymous coding mutation on the SM background  
237 (rs13489095) and *Trim32* (tripartite motif-containing 32), which contains no coding polymorphisms  
238 between the LG and SM strains.

## 239 Discussion

240 Crosses among well-characterized inbred strains are a mainstay of model organism genetics. In the  
241 present study, we used 1,063 male and female mice from LG x SM G50-56 to identify 126 loci for a  
242 variety of traits selected for their relevance to human psychiatric and metabolic diseases (Lawson and  
243 Cheverud 2010; Swerdlow et al. 2016; de Wit and Phillips 2012) (**Fig.3; Supplemental Table S1;**  
244 **Supplemental Fig.S2**). Whereas our previous work established AILs as an effective tool for fine-  
245 mapping loci identified in F2 crosses (Gonzales and Palmer 2014; Carroll et al. 2017; Parker et al. 2014;  
246 Cheng et al. 2010; Samocha et al. 2010; Parker et al. 2011; Lionikas et al. 2010), this study  
247 demonstrates that AILs are also a powerful fine mapping population in their own right. We show that  
248 several QTGs we identified are corroborated by extant human and mouse genetic data. We also  
249 replicated a number of our earlier findings.

250 Classical crosses like F<sub>2</sub> and recombinant inbred strains provide poor mapping resolution  
251 because the ancestral chromosomes persist as extremely long haplotypes (Parker and Palmer 2011). To  
252 address this limitation, we and others have used AILs (Gonzales and Palmer 2014). Because both inbred  
253 strains contribute equally to an AIL, there are numerous common variants (**Fig. 1A,B**), and each  
254 successive generation further degrades LD between adjacent SNPs (**Fig. 1C**). In addition to AILs, a  
255 number of other outbred populations have been used in rodent GWAS, including CFW mice (Nicod et al.  
256 2016; Parker et al. 2016), Diversity Outbred (**DO**) mice (Gatti et al. 2014; Logan et al. 2013), and N/NIH  
257 heterogeneous stock rats (**HS**) (Rat Genome Sequencing and Mapping Consortium et al. 2013; Tsaih et  
258 al. 2014). CFW mice are obtained from a commercial vendor, which avoids the expenses of maintaining

259 a colony. In addition, non-siblings can be obtained, which reduces the complicating effects that can occur  
260 when close relatives are used in GWAS. However, the CFW founder strains are unavailable, and many  
261 alleles exist at low frequencies among CFWs, limiting power and introducing genetic noise (Nicod et al.  
262 2016; Parker et al. 2016). Commercially available DO mice are more expensive than CFWs, but like  
263 AILs, the founder strains have been fully sequenced, which allows imputation of SNPs and founder  
264 haplotypes. However, three of the eight inbred strains used to produce the DO are so-called wild-derived  
265 strains; making DO mice very difficult to handle, which complicates many behavioral procedures (Logan  
266 et al. 2013). Furthermore, the causal alleles in the DO are often from one of the wild derived strains,  
267 because 8 strains contributed equally to the DO, this means that the causal allele frequencies are often  
268 in the range of 0.125. Finally, N/NIH HS rats, which are conceptually very similar to DO mice, have also  
269 been used as a fine mapping population (Rat Genome Sequencing and Mapping Consortium et al. 2013;  
270 Tsaih et al. 2014). Among these options, AILs stand out for their simplicity, balanced allele frequency and  
271 ease of handling.

272 A major goal of this study was to identify the genes that are responsible for the loci implicated in  
273 behavioral and physiological traits. The mapping resolution of the LG x SM AIL was critically important  
274 for this goal. However, no matter how precise the resolution, proximity of a gene to the associated SNP  
275 is never sufficient to establish causality (Albert and Kruglyak 2015). Therefore, we used RNA-seq to  
276 quantify mRNA abundance in three brain regions that are strongly implicated in the behavioral traits: HIP,  
277 PFC and STR. We used these data to identify 7,081 *cis*-eQTLs and 1,372 *trans*-eQTLs (**Fig.4,**  
278 **Supplemental Fig.S4,S5; Supplemental Tables S3,S4**). In a few cases, loci contained only a single  
279 eQTL; however, in most cases multiple *cis*-eQTLs and *trans*-eQTLs mapped to the implicated loci. Thus,  
280 we frequently incorporated functional information, including data about tissue specific expression, coding  
281 SNP, mutant mice, and human genetic studies to parse among the implicated genes.

282 We have previously shown that GBS is a cost-effective strategy for genotyping CFW mice  
283 (Fitzpatrick et al. 2013). The advantages of GBS were even greater for this AIL because imputation  
284 allowed us to easily obtain 4.3M SNPs while using only half the sequencing depth (**Fig. 1A**). Even before  
285 imputation, GBS yielded nearly 50% more informative SNPs compared to the best available SNP  
286 genotyping chip (Morgan et al. 2015) at about half the cost (**Supplemental Fig.S1**).

287 One of the goals of this study was to perform GWAS for conditioned place preference (**CPP**),  
288 which is a well-validated measure of the reinforcing effects of drugs (Tzschentke 2007). Unfortunately,  
289 the heritability of CPP in this study was not significantly different from zero (**Fig. 3B**). This result was  
290 partially consistent with our prior study in which we used a higher dose of methamphetamine (2 vs. the 1  
291 mg/kg used in the present study) (Bryant et al. 2012). The low heritability of CPP in this AIL likely reflects  
292 a lack of relevant genetic variation in this specific population since both panels of inbred strains and  
293 genetically engineered mutant alleles show differences in CPP (Tzschentke 2007; Philip et al. 2010;  
294 Martinelli et al. 2016), demonstrating the existence of heritable variance in other populations. It is  
295 possible that even lower doses of methamphetamine, which might fall on the ascending portion of the  
296 dose-response function, would have resulted in higher heritability. Similarly, responses to other drugs or  
297 different CPP methodology may have exhibited greater heritability.

298 We used PheWAS to identify pleiotropic effects of several loci identified in this study. In many  
299 cases, pleiotropy involved highly correlated traits such as body weight on different days or behavior at  
300 different time points within a single day (**Supplemental Fig.S9-S13; Supplemental Table S1**). We also  
301 observed more surprising examples of pleiotropy, including pleiotropy between locomotor activity and  
302 gastrocnemius mass on chromosome 4 (**Supplemental Fig.S14**), and pleiotropy between locomotor  
303 activity and the startle response on chromosome 12 (**Supplemental Fig.S15**). We also observed  
304 extensive pleiotropy on chromosome 17; this locus influenced saline- and methamphetamine-induced  
305 locomotor activity and startle response (**Supplemental Fig.S6**). Moreover, this same region had been  
306 previously implicated in anxiety-like behavior (Parker et al. 2014), contextual and conditioned fear  
307 (Parker et al. 2014), and startle response (Samocho et al. 2010) in prior studies of LG x SM G34,  
308 suggesting that the locus has a broad impact on many behavioral traits. These results support the idea  
309 that pleiotropy is a pervasive feature in this AIL and provide further evidence of the replicability of the loci  
310 identified by this and prior GWAS.

311 Discoveries from human GWAS are often considered preliminary until they are replicated in an  
312 independent cohort. In model organisms, replication using an independent cohort is rarely employed  
313 because it is possible to directly manipulate the implicated gene. We replicated one behavioral locus  
314 identified in this study using the criteria of both human and model organism genetics. We had previously

315 identified an association with locomotor activity on chromosome 8 using G34 of this AIL (Cheng et al.  
316 2010), which was replicated in the present study (**Fig.5**). In both cases, the SM allele was associated  
317 with lower activity (**Fig. 5C-D**). We also identified a locus for PPI (76 dB) in this region (**Fig. 5A**;  
318 **Supplemental Table S1, Supplemental Fig.S2**). The loci identified in both G34 and in G50-56 were  
319 small and contained just one gene: *Csmd1* (**Fig.5B**). In the present study we also identified a *cis*-eQTL  
320 for *Csmd1* in HIP (**Supplemental Fig.S7**). Finally, we obtained *Csmd1* mutant mice (Distler et al. 2012)  
321 and found that they also showed altered locomotor activity (**Fig.5E**). Thus, we have demonstrated  
322 replication both by performing an independent GWAS and by performing an experimental manipulation  
323 that recapitulates the phenotype.

## 324 Methods

### 325 Genetic background

326 The LG and SM inbred strains were independently selected for high and low body weight at 60 days  
327 (Beck et al. 2000). The LG x SM AIL was derived from an F<sub>1</sub> intercross of SM females and LG males  
328 initiated by Dr. James Cheverud at Washington University in St. Louis (Ehrich et al. 2005a). Subsequent  
329 AIL generations were maintained using at least 65 breeder pairs selected by pseudo-random mating  
330 (Ehrich et al. 2005b). In 2006, we established an independent AIL colony using 140 G33 mice obtained  
331 from Dr. Cheverud (Jmc: LG,SM-G33). Since 2009, we have selected breeders using an R script  
332 (**Supplemental Methods**) that leverages pairwise kinship coefficients estimated from the AIL pedigree to  
333 select the most unrelated pairs while also attempting to minimize mean kinship among individuals in the  
334 incipient generation (the full pedigree is included in **Supplemental File S1**). We maintained ~100  
335 breeder pairs in G49-55 to produce the mice for this study. In each generation, we used one male and  
336 one female from each nuclear family for phenotyping, and reserved up to three of their siblings for  
337 breeding the next generation.



## 338 Phenotypes

339 We subjected 1,123 AIL mice (562 female, 561 male; Aap: LG,SM-G50-56) to a four-week battery of  
340 tests over the course of two years. This sample size was based on an analysis suggesting that 1,000  
341 mice would provide 80% power to detect associations explaining 3% of the phenotypic variance  
342 (**Supplemental Fig.S16**). We measured CPP for 1 mg/kg methamphetamine, locomotor behavior, PPI,  
343 startle, body weight, muscle mass, bone length and other related traits (**Supplemental Table S2**). We  
344 tested mice during the light phase of a 12:12h light-dark cycle in 22 batches comprised of 24-71  
345 individuals (median=53.5). Median age was 54 days (mean=55.09, range=35-101) at the start of testing  
346 and 83 days (mean=84.4, range=64-129) at death. Standard lab chow and water were available *ad*  
347 *libitum*, except during testing. Testing was performed during the light phase, starting one hour after lights  
348 on and ending one hour before lights off. No environmental enrichment was provided. All procedures  
349 were approved by the Institutional Animal Care and Use Committee at the University of Chicago  
350 (**Supplemental File S2**). Traits are summarized briefly below; detailed descriptions are provided in the  
351 **Supplemental Methods**.

352 **CPP and locomotor behavior:** CPP is an associative learning paradigm that has been used to  
353 measure the motivational properties of drugs in humans (Mayo et al. 2013) and rodents (Tzschentke  
354 2007). We defined CPP as the number of s spent in a drug-associated environment relative to a neutral  
355 environment over the course of 30 min. The full procedure takes eight days, which we refer to as **D1-D8**.  
356 We measured baseline preference after administration of vehicle (0.9% saline, i.p.) on D1. On D2 and  
357 D4, mice were administered methamphetamine (1 mg/kg, i.p.) and restricted to one visually and tactically  
358 distinct environment; on D3 and D5 mice were administered vehicle and restricted to the other,  
359 contrasting environment. On D8, mice were allowed to choose between the two environments after  
360 administration of vehicle; we measured CPP at this time. Other variables measured during the CPP test  
361 include the distance traveled (cm) on all testing days, the number of side changes on D1 and D8, and  
362 locomotor sensitization to methamphetamine (the increase in activity on D4 relative to D2). We  
363 measured CPP and locomotor traits across six 5-min intervals and summed them to generate a total  
364 phenotype for each day.

365 **PPI and startle:** PPI is the reduction of the acoustic startle response when a loud noise is  
366 immediately preceded by a low decibel (**dB**) prepulse (Graham 1975). PPI and startle are measured  
367 across multiple trials that occur over four consecutive blocks of time (Samocha et al. 2010). The primary  
368 startle trait is the mean startle amplitude across all pulse-alone trials in blocks 1-4. Habituation to startle  
369 is the difference between the mean startle response at the start of the test (block 1) and the end of the  
370 test (block 4). PPI, which we measured at three prepulse intensities (3, 6, and 12 dB above 70 dB  
371 background noise), is the mean startle response during pulse-alone trials in blocks 2-3 normalized by the  
372 mean startle response during prepulse trials in blocks 2-3.

373 **Physiological traits:** We measured body weight (g) on each testing day and at the time of death.  
374 One week after PPI, we measured blood glucose levels (mg/dL) after a four-hour fast. One week after  
375 glucose testing, we killed the mice, and measured tail length (cm from base to tip of the tail). We stored  
376 spleens in a 1.5 mL solution of 0.9% saline at -80°C until DNA extraction. We removed the left hind limb  
377 of each mouse just below the pelvis; hind limbs were stored at -80°C. Frozen hind limbs were  
378 phenotyped by Dr. Arimantas Lionikas at the University of Aberdeen. Phenotyped muscles include two  
379 dorsiflexors, TA and EDL, and three plantar flexors: gastrocnemius, plantaris and soleus. We isolated  
380 individual muscles under a dissection microscope and weighed them to 0.1 mg precision on a Pioneer  
381 balance (Ohaus, Parsippany, NJ, USA). After removing soft tissue from the length of tibia, we measured  
382 its length to 0.01 mm precision with a Z22855 digital caliper (OWIM GmbH & Co., Neckarsulm, GER).

383 **Brain tissue:** We collected HIP, PFC and STR for RNA-seq from the brain of one mouse per  
384 cage. This allowed us to dissect each brain within five min of removing a cage from the colony room  
385 (rapid tissue collection was intended to limit stress-induced changes in gene expression). We  
386 preselected brain donors to prevent biased sampling of docile (easily caught) mice and to avoid sampling  
387 full siblings, which would reduce our power to detect eQTLs. Intact brains were extracted and submerged  
388 in chilled RNALater (Ambion, Carlsbad, CA, USA) for one min before dissection. Individual tissues were  
389 stored separately in chilled 0.5-mL tubes of RNALater. All brain tissue was dissected by the same  
390 experimenter and subsequently stored at -80°C until extraction.

## 391 GBS variant calling and imputation

392 GBS is a reduced-representation genotyping method (Elshire et al. 2011; Grabowski et al. 2014) that we  
393 have adapted for use in mice and rats (Parker et al. 2016; Fitzpatrick et al. 2013). We extracted DNA  
394 from spleen using a standard salting-out protocol and prepared GBS libraries by digesting DNA with the  
395 restriction enzyme *Pst*I, as described previously (Parker et al. 2016). We sequenced 24 uniquely  
396 barcoded samples per lane of an Illumina HiSeq 2500 using single-end, 100 bp reads. We aligned 1,110  
397 GBS libraries to the mm10 reference genome before using GATK (DePristo et al. 2011) to realign reads  
398 around known indels in LG and SM (Nikolskiy et al. 2015) (see **Supplemental Methods** and  
399 **Supplemental File S3** for details and example commands). We obtained an average of 3.2M reads per  
400 sample. We discarded 32 samples with <1M reads aligned to the main chromosome contigs (1-19, X, Y)  
401 or with a primary alignment rate <77% (i.e. three s.d. below the mean of 97.4%; **Supplemental Fig.S17**).

402 We used ANGSD (Korneliussen et al. 2014) to obtain genotype likelihoods for the remaining  
403 1,078 mice and used Beagle (Browning and Browning 2007) for variant calling, which we performed in  
404 two stages. We used first-pass variant calls as input for IBDLD (Han and Abney 2011; Abney 2008),  
405 which we used to estimate kinship coefficients for the mice in our sample. Because our sample contained  
406 opposite-sex siblings, we were able to identify and resolve sample mix-ups by comparing genetic kinship  
407 estimates to kinship estimated from the LG x SM pedigree (described in the **Supplemental Methods**). In  
408 addition, we re-genotyped 24 mice on the GigaMUGA (Morgan et al. 2015) to evaluate GBS variant calls  
409 (**Supplemental Table S5** lists concordance rates at various stages of our pipeline; see **Supplemental**  
410 **Methods** for details).

411 After identifying and correcting sample mix-ups, we discarded 15 samples whose identities could  
412 not be resolved (**Supplemental Methods**). Next, we used Beagle (Browning and Browning 2016, 2007),  
413 in conjunction with LG and SM haplotypes obtained from whole-genome sequencing data (Nikolskiy et al.  
414 2015) to impute 4.3M additional SNPs into the final sample of 1,063 mice. We removed SNPs with low  
415 MAFs (<0.1), SNPs with Hardy-Weinberg Equilibrium (**HWE**) violations ( $p \leq 7.62 \times 10^{-6}$ , determined from  
416 gene dropping simulations as described in the **Supplemental Methods**), and SNPs with low imputation

417 quality (dosage  $r^2$ ,  $DR^2 < 0.9$ ). We then pruned variants in high LD ( $r^2 > 0.95$ ) to obtain the 523,028 SNPs  
418 that we used for GWAS.

## 419 LD Decay

420 We used PLINK (Chang et al. 2015) to calculate  $r^2$  for all pairs of autosomal GWAS SNPs typed in G50-  
421 56 (parameters are listed in **Supplemental File 3**). We repeated the procedure for 3,054 SNPs that were  
422 genotyped in G34 mice (Cheng et al. 2010). Next, we randomly sampled  $r^2$  values calculated for ~40,000  
423 SNP pairs from each population and used the data to visualize the rate of LD decay (**Fig. 1c**).

## 424 LOCO-LMM

425 We used a modified LMM implemented in GEMMA (Zhou and Stephens 2012) to perform GWAS. An  
426 LMM accounts for relatedness by modeling the covariance between phenotypes and genotypes as a  
427 random, polygenic effect (Gonzales and Palmer 2014), which we also refer to as a genetic relationship  
428 matrix (**GRM**). Power to detect associations is reduced when the locus being tested is also included in  
429 the GRM because the effect of the locus is represented in both the fixed and random terms (Cheng et al.  
430 2013). To address this issue, we calculated 19 separate GRMs, each one excluding a different  
431 chromosome. When testing SNPs on a given chromosome, we used the GRM that did not include  
432 markers from that chromosome as the polygenic effect in the model. Fixed covariates for each trait are  
433 listed in **Supplemental Table S2**.

434 We used a permutation-based approach implemented in **MultiTrans** (Joo et al. 2016) and **SLIDE**  
435 (Han et al. 2009) to obtain a genome-wide significance threshold that accounts for LD between nearby  
436 markers (see **Supplemental Methods** for details). We obtained a significance threshold of  $p = 8.06 \times 10^{-6}$   
437 ( $\alpha = 0.05$ ) from 2.5M samplings. Because the phenotypic data were quantile-normalized, we applied the  
438 same threshold to all traits. We converted p-values to LOD scores and used a 1.5-LOD support interval  
439 to approximate a critical region around each associated region, which enabled us to systematically  
440 identify overlap with eQTLs.

441 We estimated the proportion of phenotypic variance explained by the set of 523,028 LD-pruned  
442 SNPs using the restricted maximum likelihood algorithm in GEMMA (Zhou and Stephens 2012). We ran

443 a second genome-wide scan for each trait, this time dropping the fixed effect of dosage and including the  
444 complete GRM estimated from SNPs on all 19 autosomes. We repeated the procedure using dosage at  
445 the most significant SNP as a covariate for each trait and interpreted the difference between the two  
446 estimates as the effect size of that locus.

## 447 RNA-sequencing and quality control

448 We extracted mRNA from HIP, PFC and STR as described in Parker et al. (2016) and prepared  
449 cDNA libraries from 741 samples with RNA integrity scores  $\geq 8.0$  (265 HIP; 240 PFC; 236 STR)  
450 (Schroeder et al. 2006) as measured on a Bioanalyzer (Agilent, Wilmington, DE, USA). We used Quant-  
451 iT kits to quantify RNA (Ribogreen) and cDNA (Picogreen; Fisher Scientific, Pittsburgh, PA, USA).  
452 Barcoded sequencing libraries were prepared with the TruSeq RNA Kit (Illumina, San Diego, USA),  
453 pooled in sets of 24, and sequenced on two lanes of an Illumina HiSeq 2500 using 100 bp, single-end  
454 reads.

455 Because mapping quality tends to be higher for reads that closely match the reference genome  
456 (Degner et al. 2009), read mapping in an AIL may be biased toward the reference strain (C57BL/6J)  
457 (Wang and Clark 2014). We addressed this concern by aligning RNA-seq reads to custom genomes  
458 created from LG and SM using whole-genome sequence data (Nikolskiy et al. 2015). We used default  
459 parameters in HISAT (Kim et al. 2015) for alignment and GenomicAlignments (Lawrence et al. 2013) for  
460 assembly, assigning each read to a gene as defined by Ensembl (*Mus\_musculus.GRCm38.85*) (Aken et  
461 al. 2016). We required that each read overlap one unique disjoint region of the gene. If a read contained  
462 a region overlapping multiple genes, genes were split into disjoint intervals, and any shared regions  
463 between them were hidden. If the read overlapped one of the remaining intervals, it was assigned to the  
464 gene that the interval originated from; otherwise, it was discarded. Next, we reassigned the mapping  
465 position and CIGAR strings for each read to match mm10 genome coordinates and combined the LG  
466 and SM alignment files for each sample by choosing the best mapping. Only uniquely mapped reads  
467 were included in the final alignment files. We then used DESeq (Anders and Huber 2010) to obtain  
468 normalized read counts for each gene in HIP, PFC and STR. We excluded genes detected in <95% of  
469 samples within each tissue.

470 We also excluded 30 samples with <5M mapped reads or with an alignment rate <91.48% (i.e.  
471 less than 1 s.d. below the mean number of reads or the mean alignment rate across all samples and  
472 tissues; **Supplemental Fig.S18**). We merged expression data from HIP, PFC and STR and plotted the  
473 first two principal components (**PCs**) of the data to identify potential tissue swaps. Most samples  
474 clustered into distinct groups based on tissue. We reassigned 12 mismatched samples to new tissues  
475 and removed 35 apparently contaminated samples that did not cluster with the rest of the data  
476 (**Supplemental Fig.S19**). We also used agreement among GBS genotypes and genotypes called from  
477 RNA-seq data in the same individuals to identify and resolve mixed-up samples, as detailed in the  
478 **Supplemental Methods**. We discarded 108 sample mix-ups that we were not able to resolve, 29  
479 samples with low-quality GBS data, and 12 outliers (details are provided in the **Supplemental Methods**).  
480 A total of 208 HIP, 185 PFC, and 169 STR samples were retained for further analyses.

481 Prior to eQTL mapping, we quantile-normalized gene expression data and used principal  
482 components analysis to remove the effects of unknown confounding variables (Pickrell et al. 2010). For  
483 each tissue, we calculated the first 100 PCs of the gene x sample gene expression matrix. We quantile-  
484 normalized PCs and used GEMMA (Zhou and Stephens 2012) to test for association with SNPs using  
485 sex and batch as covariates. We evaluated significance with the same permutation-based threshold used  
486 for GWAS. We retained PCs that showed evidence of association with a SNP in order to avoid removing  
487 *trans*-eQTL effects. We then used linear regression to remove the effects of the remaining PCs (71 in  
488 HIP, 81 in STR and 93 in PFC) and quantile-normalized the residuals.

## 489 eQTL mapping

490 We mapped *cis*- and *trans*-eQTLs using a LOCO-LMM (Cheng et al. 2013) implemented in GEMMA  
491 (Zhou and Stephens 2012), conservatively including sex and batch as covariates even though PC  
492 regression might have accounted for them (see **Supplemental Methods** for details).

493 We considered intergenic SNPs and SNPs 1 Mb upstream or downstream of the gene as  
494 potential *cis*-eQTLs and excluded 2,143 genes that had no SNPs within their *cis*-regions. We used  
495 eigenMT (Davis et al. 2016) to obtain a gene-based p-value adjusted for the number of independent

496 SNPs in each *cis* region. We declared *cis*-eQTLs significant at an FDR<0.05. We refer to genes with  
497 significant *cis*-eQTLs as ***cis*-eGenes**.

498 SNPs on chromosomes that did not contain the gene being tested were considered potential  
499 *trans*-eQTLs. We determined significance thresholds for *trans*-eQTLs by permuting data 1,000 times.  
500 Since expression data were quantile-normalized, we permuted one randomly chosen gene per tissue.  
501 The significance threshold for *trans*-eQTLs was  $8.68 \times 10^{-6}$  in STR,  $9.01 \times 10^{-6}$  in PFC ( $\alpha=0.05$ ). We used  
502 all SNPs for permutation; therefore, we expect these thresholds to be conservative. We refer to genes  
503 with *trans*-eQTLs as ***trans*-eGenes**. Finally, we defined *trans*-eQTL hotspots or '**master eQTLs**' as 5 Mb  
504 regions that contain ten or more *trans*-eQTLs. To identify master eQTLs, we divided chromosomes into 5  
505 Mb bins and assigned each *trans*-eGene to the bin containing its most significant eQTL SNP.

## 506 *Csmd1* mutant mice

507 *Csmd1* mutants were created by Lexicon Genetics by inserting a Neomycin cassette into the first exon of  
508 *Csmd1* using embryonic stem cells derived from 129S5 mice (Friddle et al. 2003) as described by Distler  
509 et al. (2012). The mice we used were the result of a C57BL/6 x 129S5 intercross designated B6;129S5-  
510 *Csmd1*<sup>tm1Lex</sup>/Mmucd (the exact C57BL/6 substrain is unknown). We bred heterozygous males and  
511 females and tested littermate offspring to account for their mixed genetic background. *Csmd1* spans 1.6  
512 Mb and has 70 exons. Its four major transcripts, termed *Csmd1-1* to *Csmd1-4*, are expressed in the  
513 central nervous system (Distler et al. 2012). Distler et al. (2012) demonstrated that *Csmd1* homozygous  
514 mutant mice express <30% of wild-type *Csmd1* levels in the brain, and heterozygous mice show a 54%  
515 reduction in *Csmd1* expression. Residual expression of *Csmd1* in homozygous mutant mice is derived  
516 from *Csmd1-4*, the only transcript that does not include the first exon. We analyzed locomotor behavior  
517 on two days following a saline injection in 31 wild-type, 59 heterozygous, and 48 mutant mice.

## 518 Data access

519 Genotypes, phenotypes and gene expression data from LG x SM G50-56 mice have been submitted to  
520 GeneNetwork (<http://www.genenetwork.org>; accession number is in process). The AIL pedigree is

521 provided in **Supplemental File S1** and code to run the analyses in this study are provided in

522 **Supplemental File S3**.

## 523 Acknowledgements

524 We would like to recognize Clarissa Parker for exceptional mentorship and for training NMG in mouse  
525 behavioral research. We are grateful to Heather Lawson at the Washington University in St. Louis for  
526 providing LG/J and SM/J genome sequences. We thank the Gilad Lab and Functional Genomics Facility  
527 at the University of Chicago for generating DNA- and RNA-seq data. We wish to acknowledge  
528 outstanding technical assistance from Mike Jarsulic at the Biological Sciences Division Center for  
529 Research Informatics at the University of Chicago and Apurva Chitre at UCSD. Finally, we thank John  
530 Novembre, Graham McVicker, Joe Davis, Peter Carbonetto and Shyam Gopalakrishnan for advice  
531 regarding GBS, RNA-seq, and statistical analysis.

532 **Funding:** This work was funded by NIDA (AAP: R01 DA021336) and NIAMS (AL:  
533 R01AR056280). We also received support from NIGMS (NMG: T32 GM007197; MGD: T32GM07281),  
534 NIDA (NMG: F31 DA03635803), NHGRI (MA: R01 HG002899), and the IMS Elphinstone Scholarship at  
535 the University of Aberdeen (AIHC). The content is solely the responsibility of the authors and does not  
536 necessarily represent the official views of the NIH.

537 **Author contributions:** NMG maintained the AIL colony, phenotyped the mice, prepared RNA-  
538 sequencing libraries, and performed QTL/eQTL analysis under supervision of AAP and MA. AAP and MA  
539 also provided computational resources for the analyses in this paper. JS prepared RNA-sequencing data  
540 for eQTL mapping under supervision of SC. CLS assisted with colony maintenance, tissue collection,  
541 RNA extraction, and GBS library preparation. MGD performed experiments in mutant mice. AL, JSG and  
542 AIHC measured hind limb muscle and bone phenotypes. NMG co-wrote the manuscript with AAP, who  
543 designed the study.



## References

- Abney M. 2008. Identity-by-descent estimation and mapping of qualitative traits in large, complex pedigrees. *Genetics* **179**: 1577–1590.
- Aken BL, Ayling S, Barrell D, Clarke L, Curwen V, Fairley S, Fernandez Banet J, Billis K, García Girón C, Hourlier T, et al. 2016. The Ensembl gene annotation system. *Database J Biol Databases Curation* **2016**.
- Albert FW, Kruglyak L. 2015. The role of regulatory variation in complex traits and disease. *Nat Rev Genet* **16**: 197–212.
- Anders S, Huber W. 2010. Differential expression analysis for sequence count data. *Genome Biol* **11**: R106.
- Baehr W, Frederick JM. 2009. Naturally occurring animal models with outer retina phenotypes. *Vision Res* **49**: 2636–2652.
- Beck JA, Lloyd S, Hafezparast M, Lennon-Pierce M, Eppig JT, Festing MF, Fisher EM. 2000. Genealogies of mouse inbred strains. *Nat Genet* **24**: 23–25.
- Berndt SI, Gustafsson S, Mägi R, Ganna A, Wheeler E, Feitosa MF, Justice AE, Monda KL, Croteau-Chonka DC, Day FR, et al. 2013. Genome-wide meta-analysis identifies 11 new loci for anthropometric traits and provides insights into genetic architecture. *Nat Genet* **45**: 501–512.
- Browning BL, Browning SR. 2016. Genotype Imputation with Millions of Reference Samples. *Am J Hum Genet* **98**: 116–126.
- Browning SR, Browning BL. 2007. Rapid and Accurate Haplotype Phasing and Missing-Data Inference for Whole-Genome Association Studies By Use of Localized Haplotype Clustering. *Am J Hum Genet* **81**: 1084–1097.
- Brunschwig H, Levi L, Ben-David E, Williams RW, Yakir B, Shifman S. 2012. Fine-scale maps of recombination rates and hotspots in the mouse genome. *Genetics* **191**: 757–764.
- Bryant CD, Kole LA, Guido MA, Cheng R, Palmer AA. 2012. Methamphetamine-induced conditioned place preference in LG/J and SM/J mouse strains and an F45/F46 advanced intercross line. *Front Genet* **3**: 126.
- Carroll AM, Cheng R, Collie-Duguid ESR, Meharg C, Scholz ME, Fiering S, Fields JL, Palmer AA, Lionikas A. 2017. Fine-mapping of genes determining extrafusal fiber properties in murine soleus muscle. *Physiol Genomics* **49**: 141–150.
- Cavalcanti DMLP, Castro LM, Rosa Neto JC, Seelaender M, Neves RX, Oliveira V, Forti FL, Iwai LK, Gozzo FC, Todiras M, et al. 2014. Neurolysin knockout mice generation and initial phenotype characterization. *J Biol Chem* **289**: 15426–15440.
- Chang CC, Chow CC, Tellier LC, Vattikuti S, Purcell SM, Lee JJ. 2015. Second-generation PLINK: rising to the challenge of larger and richer datasets. *GigaScience* **4**: 7.
- Cheng R, Lim JE, Samocha KE, Sokoloff G, Abney M, Skol AD, Palmer AA. 2010. Genome-wide association studies and the problem of relatedness among advanced intercross lines and other highly recombinant populations. *Genetics* **185**: 1033–1044.

- Cheng R, Parker CC, Abney M, Palmer AA. 2013. Practical considerations regarding the use of genotype and pedigree data to model relatedness in the context of genome-wide association studies. *G3 Bethesda Md* **3**: 1861–1867.
- Chesler EJ, Lu L, Shou S, Qu Y, Gu J, Wang J, Hsu HC, Mountz JD, Baldwin NE, Langston MA, et al. 2005. Complex trait analysis of gene expression uncovers polygenic and pleiotropic networks that modulate nervous system function. *Nat Genet* **37**: 233–242.
- Comuzzie AG, Cole SA, Laston SL, Voruganti VS, Haack K, Gibbs RA, Butte NF. 2012. Novel genetic loci identified for the pathophysiology of childhood obesity in the Hispanic population. *PLoS One* **7**: e51954.
- Darvasi A, Soller M. 1995. Advanced intercross lines, an experimental population for fine genetic mapping. *Genetics* **141**: 1199–1207.
- Davis JR, Fresard L, Knowles DA, Pala M, Bustamante CD, Battle A, Montgomery SB. 2016. An Efficient Multiple-Testing Adjustment for eQTL Studies that Accounts for Linkage Disequilibrium between Variants. *Am J Hum Genet* **98**: 216–224.
- de Wit H, Phillips TJ. 2012. Do initial responses to drugs predict future use or abuse? *Neurosci Biobehav Rev* **36**: 1565–1576.
- Degner JF, Marioni JC, Pai AA, Pickrell JK, Nkadori E, Gilad Y, Pritchard JK. 2009. Effect of read-mapping biases on detecting allele-specific expression from RNA-sequencing data. *Bioinforma Oxf Engl* **25**: 3207–3212.
- DePristo MA, Banks E, Poplin R, Garimella KV, Maguire JR, Hartl C, Philippakis AA, del Angel G, Rivas MA, Hanna M, et al. 2011. A framework for variation discovery and genotyping using next-generation DNA sequencing data. *Nat Genet* **43**: 491–498.
- Distler MG, Opal MD, Dulawa SC, Palmer AA. 2012. Assessment of behaviors modeling aspects of schizophrenia in *Csmd1* mutant mice. *PLoS One* **7**: e51235.
- Ehrich TH, Hrbek T, Kenney-Hunt JP, Pletscher LS, Wang B, Semenkovich CF, Cheverud JM. 2005a. Fine-mapping gene-by-diet interactions on chromosome 13 in a LGVJ X SMVJ murine model of obesity. *Diabetes* **54**: 1863–1872.
- Ehrich TH, Kenney-Hunt JP, Pletscher LS, Cheverud JM. 2005b. Genetic variation and correlation of dietary response in an advanced intercross mouse line produced from two divergent growth lines. *Genet Res* **85**: 211–222.
- Elshire RJ, Glaubitz JC, Sun Q, Poland JA, Kawamoto K, Buckler ES, Mitchell SE. 2011. A robust, simple genotyping-by-sequencing (GBS) approach for high diversity species. *PLoS One* **6**: e19379.
- Filliol D, Ghozland S, Chluba J, Martin M, Matthes HW, Simonin F, Befort K, Gavériaux-Ruff C, Dierich A, LeMeur M, et al. 2000. Mice deficient for delta- and mu-opioid receptors exhibit opposing alterations of emotional responses. *Nat Genet* **25**: 195–200.
- Fitzpatrick CJ, Gopalakrishnan S, Cogan ES, Yager LM, Meyer PJ, Lovic V, Saunders BT, Parker CC, Gonzales NM, Aryee E, et al. 2013. Variation in the form of Pavlovian conditioned approach behavior among outbred male Sprague-Dawley rats from different vendors and colonies: sign-tracking vs. goal-tracking. *PLoS One* **8**: e75042.
- Flint J, Mackay TFC. 2009. Genetic architecture of quantitative traits in mice, flies, and humans. *Genome Res* **19**: 723–733.

- Friddle CJ, Abuin A, Ramirez-Solis R, Richter LJ, Buxton EC, Edwards J, Finch RA, Gupta A, Hansen G, Holt KH, et al. 2003. High-throughput mouse knockouts provide a functional analysis of the genome. *Cold Spring Harb Symp Quant Biol* **68**: 311–315.
- Gatti DM, Svenson KL, Shabalin A, Wu L-Y, Valdar W, Simecek P, Goodwin N, Cheng R, Pomp D, Palmer A, et al. 2014. Quantitative trait locus mapping methods for diversity outbred mice. *G3 Bethesda Md* **4**: 1623–1633.
- Gonzales NM, Palmer AA. 2014. Fine-mapping QTLs in advanced intercross lines and other outbred populations. *Mamm Genome Off J Int Mamm Genome Soc* **25**: 271–292.
- Grabowski PP, Morris GP, Casler MD, Borevitz JO. 2014. Population genomic variation reveals roles of history, adaptation and ploidy in switchgrass. *Mol Ecol* **23**: 4059–4073.
- Graham FK. 1975. Presidential Address, 1974. The more or less startling effects of weak prestimulation. *Psychophysiology* **12**: 238–248.
- GTEEx Consortium, Analysts L, Laboratory DA& CC (LDACC), Management N program, Collection B, Pathology, Group eQTL manuscript working, Battle A, Brown CD, Engelhardt BE, et al. 2017. Genetic effects on gene expression across human tissues. *Nature* **550**: 204–213.
- Han B, Kang HM, Eskin E. 2009. Rapid and accurate multiple testing correction and power estimation for millions of correlated markers. *PLoS Genet* **5**: e1000456.
- Han L, Abney M. 2011. Identity by descent estimation with dense genome-wide genotype data. *Genet Epidemiol* **35**: 557–567.
- Hasin-Brumshtein Y, Khan AH, Hormozdiari F, Pan C, Parks BW, Petyuk VA, Piehowski PD, Brümmer A, Pellegrini M, Xiao X, et al. 2016. Hypothalamic transcriptomes of 99 mouse strains reveal trans eQTL hotspots, splicing QTLs and novel non-coding genes. *eLife* **5**.
- Joo JWJ, Hormozdiari F, Han B, Eskin E. 2016. Multiple testing correction in linear mixed models. *Genome Biol* **17**: 62.
- Kadkhodaei B, Ito T, Joodmardi E, Mattsson B, Rouillard C, Carta M, Muramatsu S, Sumi-Ichinose C, Nomura T, Metzger D, et al. 2009. Nurr1 is required for maintenance of maturing and adult midbrain dopamine neurons. *J Neurosci Off J Soc Neurosci* **29**: 15923–15932.
- Kim D, Langmead B, Salzberg SL. 2015. HISAT: a fast spliced aligner with low memory requirements. *Nat Methods* **12**: 357–360.
- Korneliussen TS, Albrechtsen A, Nielsen R. 2014. ANGSD: Analysis of Next Generation Sequencing Data. *BMC Bioinformatics* **15**: 356.
- Lawrence M, Huber W, Pagès H, Aboyoun P, Carlson M, Gentleman R, Morgan MT, Carey VJ. 2013. Software for computing and annotating genomic ranges. *PLoS Comput Biol* **9**: e1003118.
- Lawson HA, Cheverud JM. 2010. Metabolic syndrome components in murine models. *Endocr Metab Immune Disord Drug Targets* **10**: 25–40.
- Lionikas A, Cheng R, Lim JE, Palmer AA, Blizard DA. 2010. Fine-mapping of muscle weight QTL in LG/J and SM/J intercrosses. *Physiol Genomics* **42A**: 33–38.
- Lionikas A, Meharg C, Derry JM, Ratkevicius A, Carroll AM, Vandenberg DJ, Blizard DA. 2012. Resolving candidate genes of mouse skeletal muscle QTL via RNA-Seq and expression network analyses. *BMC Genomics* **13**: 592.

- Listgarten J, Lippert C, Kadie CM, Davidson RI, Eskin E, Heckerman D. 2012. Improved linear mixed models for genome-wide association studies. *Nat Methods* **9**: 525–526.
- Locke AE, Kahali B, Berndt SI, Justice AE, Pers TH, Day FR, Powell C, Vedantam S, Buchkovich ML, Yang J, et al. 2015. Genetic studies of body mass index yield new insights for obesity biology. *Nature* **518**: 197–206.
- Logan RW, Robledo RF, Recla JM, Philip VM, Bubier JA, Jay JJ, Harwood C, Wilcox T, Gatti DM, Bult CJ, et al. 2013. High-precision genetic mapping of behavioral traits in the diversity outbred mouse population. *Genes Brain Behav* **12**: 424–437.
- Martinelli DC, Chew KS, Rohlmann A, Lum MY, Ressler S, Hattar S, Brunger AT, Missler M, Südhof TC. 2016. Expression of C1ql3 in Discrete Neuronal Populations Controls Efferent Synapse Numbers and Diverse Behaviors. *Neuron* **91**: 1034–1051.
- Mayo LM, Fraser D, Childs E, Momenan R, Hommer DW, de Wit H, Heilig M. 2013. Conditioned preference to a methamphetamine-associated contextual cue in humans. *Neuropsychopharmacol Off Publ Am Coll Neuropsychopharmacol* **38**: 921–929.
- Morgan AP, Fu C-P, Kao C-Y, Welsh CE, Didion JP, Yadgary L, Hyacinth L, Ferris MT, Bell TA, Miller DR, et al. 2015. The Mouse Universal Genotyping Array: From Substrains to Subspecies. *G3 Bethesda Md* **6**: 263–279.
- Nicod J, Davies RW, Cai N, Hassett C, Goodstadt L, Cosgrove C, Yee BK, Lionikaite V, McIntyre RE, Remme CA, et al. 2016. Genome-wide association of multiple complex traits in outbred mice by ultra low-coverage sequencing. *Nat Genet* **48**: 912–918.
- Nikolskiy I, Conrad DF, Chun S, Fay JC, Cheverud JM, Lawson HA. 2015. Using whole-genome sequences of the LG/J and SM/J inbred mouse strains to prioritize quantitative trait genes and nucleotides. *BMC Genomics* **16**: 415.
- Parker CC, Carbonetto P, Sokoloff G, Park YJ, Abney M, Palmer AA. 2014. High-resolution genetic mapping of complex traits from a combined analysis of F2 and advanced intercross mice. *Genetics* **198**: 103–116.
- Parker CC, Cheng R, Sokoloff G, Lim JE, Skol AD, Abney M, Palmer AA. 2011. Fine-mapping alleles for body weight in LG/J X SM/J F2 and F(34) advanced intercross lines. *Mamm Genome Off J Int Mamm Genome Soc* **22**: 563–571.
- Parker CC, Gopalakrishnan S, Carbonetto P, Gonzales NM, Leung E, Park YJ, Aryee E, Davis J, Blizard DA, Ackert-Bicknell CL, et al. 2016. Genome-wide association study of behavioral, physiological and gene expression traits in outbred CFW mice. *Nat Genet* **48**: 919–926.
- Parker CC, Palmer AA. 2011. Dark matter: are mice the solution to missing heritability? *Front Genet* **2**: 32.
- Philip VM, Duvvuru S, Gomero B, Ansah TA, Blaha CD, Cook MN, Hamre KM, Lariviere WR, Matthews DB, Mittleman G, et al. 2010. High-throughput behavioral phenotyping in the expanded panel of BXD recombinant inbred strains. *Genes Brain Behav* **9**: 129–159.
- Pickrell JK, Marioni JC, Pai AA, Degner JF, Engelhardt BE, Nkadori E, Veyrieras J-B, Stephens M, Gilad Y, Pritchard JK. 2010. Understanding mechanisms underlying human gene expression variation with RNA sequencing. *Nature* **464**: 768–772.

- Rat Genome Sequencing and Mapping Consortium, Baud A, Hermsen R, Guryev V, Stridh P, Graham D, McBride MW, Foroud T, Calderari S, Diez M, et al. 2013. Combined sequence-based and genetic mapping analysis of complex traits in outbred rats. *Nat Genet* **45**: 767–775.
- Samocha KE, Lim JE, Cheng R, Sokoloff G, Palmer AA. 2010. Fine mapping of QTL for prepulse inhibition in LG/J and SM/J mice using F(2) and advanced intercross lines. *Genes Brain Behav* **9**: 759–767.
- Schroeder A, Mueller O, Stocker S, Salowsky R, Leiber M, Gassmann M, Lightfoot S, Menzel W, Granzow M, Ragg T. 2006. The RIN: an RNA integrity number for assigning integrity values to RNA measurements. *BMC Mol Biol* **7**: 3.
- Stretton C, Litherland GJ, Moynihan A, Hajduch E, Hundal HS. 2009. Expression and modulation of TUB by insulin and thyroid hormone in primary rat and murine 3T3-L1 adipocytes. *Biochem Biophys Res Commun* **390**: 1328–1333.
- Swerdlow NR, Braff DL, Geyer MA. 2016. Sensorimotor gating of the startle reflex: what we said 25 years ago, what has happened since then, and what comes next. *J Psychopharmacol Oxf Engl* **30**: 1072–1081.
- Tsaih S-W, Holl K, Jia S, Kaldunski M, Tschannen M, He H, Andrae JW, Li S-H, Stoddard A, Wiederhold A, et al. 2014. Identification of a novel gene for diabetic traits in rats, mice, and humans. *Genetics* **198**: 17–29.
- Tzschentke TM. 2007. Measuring reward with the conditioned place preference (CPP) paradigm: update of the last decade. *Addict Biol* **12**: 227–462.
- Wang X, Clark AG. 2014. Using next-generation RNA sequencing to identify imprinted genes. *Heredity* **113**: 156–166.
- Zhou X, Stephens M. 2012. Genome-wide efficient mixed-model analysis for association studies. *Nat Genet* **44**: 821–824.
